**Title:** Smoking Prevalence is Low in Symptomatic Patients Admitted for COVID-19.

**Authors:** Nicola Gaibazzi, Domenico Tuttolomondo, Angela Guidorossi, Andrea Botti, Andrea Tedeschi, Chiara Martini, Maria Mattioli.

**Corresponding Author:** Nicola Gaibazzi, MD, Department of Non-invasive Cardiology, Parma University Hospital, Via Gramsci 14, Parma, 43126, Italy

Telephone number +39 0521 703274

Fax number +39 0521 702189

E-mail address [ngaibazzi@gmail.com](mailto:ngaibazzi@gmail.com)

The authors have withdrawn this manuscript at the request of their local IRB, because the objectives outlined in this study were not specifically approved by the IRB. Therefore, the authors do not wish this work to be cited as reference for the project. If you have any questions, please contact the corresponding author.
